# Supplementary material for: Modulation of cytotoxicity by consecutive adsorption of tannic acid and pesticides on surfactant functionalized zeolites
Source: Royal Society of Chemistry journal article supplement (doi:10.1039/d0em00251h), 2020-01-01
Supplement: d0em00251h1.pdf [file d0em00251h1.pdf]

Supplemental data

**Modulation of cytotoxicity by consecutive adsorption of tannic acid and pesticide on surfactant functionalized zeolites**

Anka Jevremović, Nevena Božinović, Dragana Arsenijević, Sanal Marmakov, Bojana Nedić Vasiljević, Snežana Uskoković-Marković, Danica Bajuk-Bogdanović, Maja Milojević-Rakić

Table S1. Summarized data from several papers - green highlighted the maximum adsorbed quantity given in the paper, yellow highlights are related to the maximum available amount of tannic acid (TA) that could be adsorbed in suspension mixture and blue denotes calculated adsorption efficiency for TA removal.

| Adsorbent/ref                                                                                                                                         | Mass adsorbent /mg | Conc. TA /mg/L | Vol. TA/ml | maximum adsorbed quantity/mg/g | quantity in suspension/mg/g | removal efficiency/% |
|-------------------------------------------------------------------------------------------------------------------------------------------------------|--------------------|----------------|------------|--------------------------------|-----------------------------|----------------------|
| Natural zeolite - cetylpyridinium bromide<br>J. Lin et al. / Journal of Hazardous Materials 193 (2011) 102–111                                        | 50                 | 100            | 100        | 93.3                           | 200                         | 46.65                |
| Amino-functionalized magnetic MCM-41<br>J. Wang et al. / Chemical Engineering Journal 165 (2010) 10–16                                                | 10                 | 200            | 50         | 512.57                         | 1000                        | 51.26                |
| Amino-functionalized magnetic nanoparticles<br>J. Wang et al. / Desalination 273 (2011) 285–291                                                       | 20                 | 100            | 50         | 142.45                         | 250                         | 56.98                |
| bentonite clay / hexadecyltrimethylammonium chloride<br>T.S. Anirudhan, M. Ramachandran / Journal of Colloid and Interface Science 299 (2006) 116–124 | 100                | 680.4          | 50         | 166,736                        | 340                         | 49.04                |
| chitosan-montmorillonite<br>J.-H. An, S. Dultz / Applied Clay Science 36 (2007) 256–264                                                               | 30                 | 1000           | 30         | 240                            | 1000                        | 24.00                |
| hydrotalcite calcined<br>Thayyath S. Anirudhan and Padmajan S. Suchithra / Ind. Eng. Chem. Res 46 (2007) 4606–4613                                    | 100                | 1275           | 50         | 520                            | 640                         | 81.25                |

|                                                                 |           |             |          |             |           |              |
|-----------------------------------------------------------------|-----------|-------------|----------|-------------|-----------|--------------|
| trimethyl ammonium chloride modified attapulgite                |           |             |          |             |           |              |
| J. Huang et al. / Journal of Hazardous Materials (2008) 382–387 | 200       | 1000        | 50       | 200         | 250       | 80.00        |
| deacetylated konjac glucomannan                                 |           |             |          |             |           |              |
| F. Liu et al. / Journal of Hazardous Materials (2010) 844–850   | 200       | 8505        | 50       | 892         | 2126      | 41.96        |
| <b>cationic surfactants /FAU zeolites</b>                       | <b>50</b> | <b>2000</b> | <b>2</b> | <b>67.7</b> | <b>80</b> | <b>84.62</b> |
| <b>Manuscript data</b>                                          |           |             |          |             |           |              |

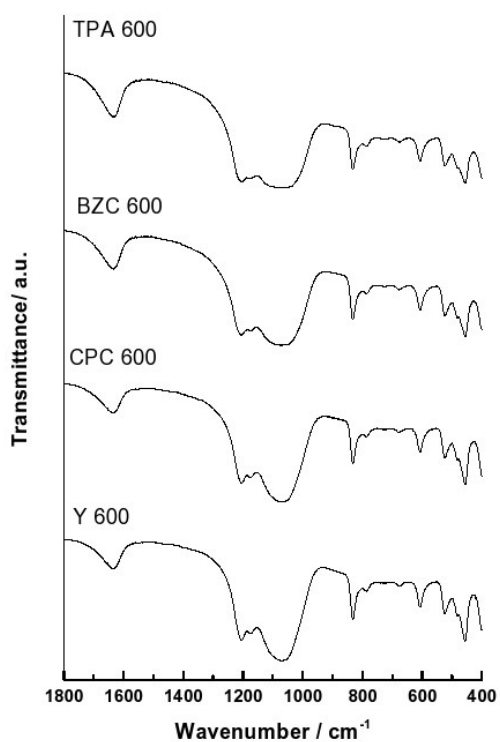

Fig. S1. FTIR spectra of Y 600 and corresponding modified samples

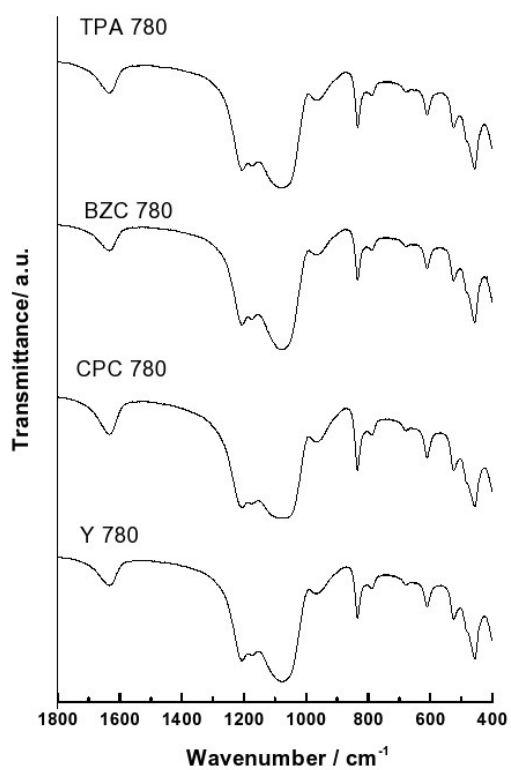

Fig S2. FTIR spectra of Y 780 and corresponding modified samples

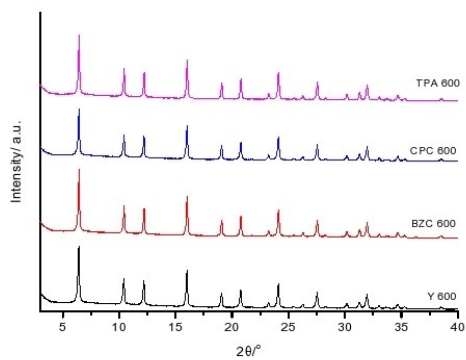

Fig.S3. XRD patterns of the Y 600 and corresponding modified samples

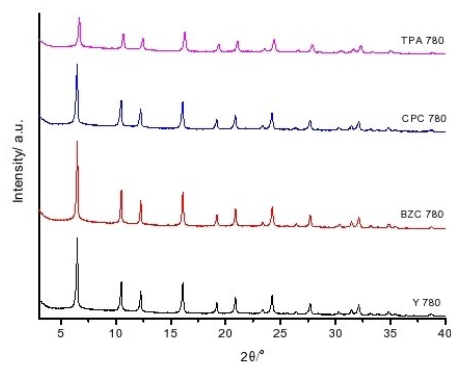

Fig.S4. XRD patterns of the Y 780 and corresponding modified samples

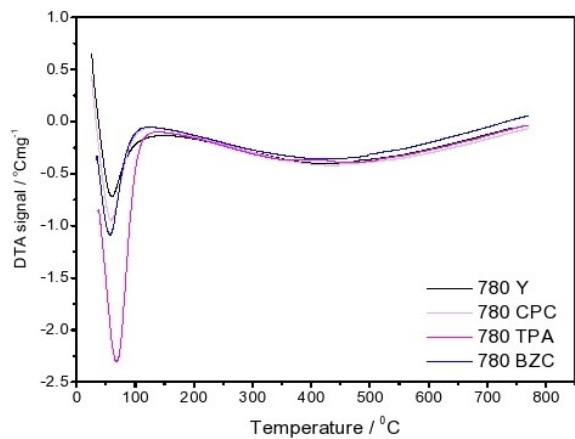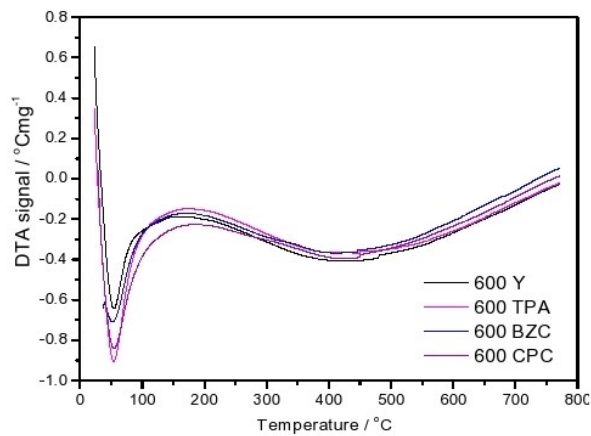

Fig. S5. DTA curves for zeolites Y 780, Y 600 and corresponding modified samples
